# Supplementary material
Source: publisher figshare collection journal article supplement (https://acs.figshare.com/ndownloader/files/5111413)
Supplement: Supplementary file 1 [file 5111413]

  
data_jr230s 
  
_audit_creation_method            SHELXL-97 
_chemical_name_systematic 
; 
 ? 
; 
_chemical_name_common             ? 
_chemical_melting_point           ? 
_chemical_formula_moiety          ? 
_chemical_formula_sum 
 'C38 H20 B2 F8 Mn2 O6' 
_chemical_formula_weight          856.04 
  
loop_ 
 _atom_type_symbol 
 _atom_type_description 
 _atom_type_scat_dispersion_real 
 _atom_type_scat_dispersion_imag 
 _atom_type_scat_source 
 'C'  'C'   0.0033   0.0016 
 'International Tables Vol C Tables 4.2.6.8 and 6.1.1.4' 
 'H'  'H'   0.0000   0.0000 
 'International Tables Vol C Tables 4.2.6.8 and 6.1.1.4' 
 'B'  'B'   0.0013   0.0007 
 'International Tables Vol C Tables 4.2.6.8 and 6.1.1.4' 
 'O'  'O'   0.0106   0.0060 
 'International Tables Vol C Tables 4.2.6.8 and 6.1.1.4' 
 'F'  'F'   0.0171   0.0103 
 'International Tables Vol C Tables 4.2.6.8 and 6.1.1.4' 
 'Mn'  'Mn'   0.3368   0.7283 
 'International Tables Vol C Tables 4.2.6.8 and 6.1.1.4' 
  
_symmetry_cell_setting            Monoclinic 
_symmetry_space_group_name_H-M    P2(1)/n 
  
loop_ 
 _symmetry_equiv_pos_as_xyz 
 'x, y, z' 
 '-x+1/2, y+1/2, -z+1/2' 
 '-x, -y, -z' 
 'x-1/2, -y-1/2, z-1/2' 
  
_cell_length_a                    10.5826(7) 
_cell_length_b                    18.6465(12) 
_cell_length_c                    17.0073(11) 
_cell_angle_alpha                 90.00 
_cell_angle_beta                  98.4740(10) 
_cell_angle_gamma                 90.00 
_cell_volume                      3319.4(4) 
_cell_formula_units_Z             4 
_cell_measurement_temperature     100(2) 
_cell_measurement_reflns_used     9982 
_cell_measurement_theta_min       2.18 
_cell_measurement_theta_max       28.09 
  
_exptl_crystal_description        plate 
_exptl_crystal_colour             orange 
_exptl_crystal_size_max           0.123 
_exptl_crystal_size_mid           0.063 
_exptl_crystal_size_min           0.043 
_exptl_crystal_density_meas       0 
_exptl_crystal_density_diffrn     1.713 
_exptl_crystal_density_method     'not measured' 
_exptl_crystal_F_000              1712 
_exptl_absorpt_coefficient_mu     0.857 
_exptl_absorpt_correction_type    multi-scan 
_exptl_absorpt_correction_T_min   ? 
_exptl_absorpt_correction_T_max   ? 
_exptl_absorpt_process_details    ? 
  
_exptl_special_details 
; 
 ? 
; 
  
_diffrn_ambient_temperature       100(2) 
_diffrn_radiation_wavelength      0.71073 
_diffrn_radiation_type            MoK\a 
_diffrn_radiation_source          'fine-focus sealed tube' 
_diffrn_radiation_monochromator   graphite 
_diffrn_measurement_device_type   'CCD area detector' 
_diffrn_measurement_method        'phi and omega scans' 
_diffrn_detector_area_resol_mean  ? 
_diffrn_standards_number          ? 
_diffrn_standards_interval_count  ? 
_diffrn_standards_interval_time   ? 
_diffrn_standards_decay_%         ? 
_diffrn_reflns_number             35350 
_diffrn_reflns_av_R_equivalents   0.0643 
_diffrn_reflns_av_sigmaI/netI     0.0564 
_diffrn_reflns_limit_h_min        -13 
_diffrn_reflns_limit_h_max        12 
_diffrn_reflns_limit_k_min        -23 
_diffrn_reflns_limit_k_max        23 
_diffrn_reflns_limit_l_min        -20 
_diffrn_reflns_limit_l_max        21 
_diffrn_reflns_theta_min          1.63 
_diffrn_reflns_theta_max          26.38 
_reflns_number_total              6787 
_reflns_number_gt                 5091 
_reflns_threshold_expression      >2sigma(I) 
  
_computing_data_collection        'Bruker SMART' 
_computing_cell_refinement        'Bruker SAINT' 
_computing_data_reduction         'Bruker SAINT' 
_computing_structure_solution     'SHELXS-97 (Sheldrick, 1990)' 
_computing_structure_refinement   'SHELXL-97 (Sheldrick, 1997)' 
_computing_molecular_graphics     'Bruker SHELXTL' 
_computing_publication_material   'Bruker SHELXTL' 
  
_refine_special_details 
; 
 Refinement of F^2^ against ALL reflections.  The weighted R-factor wR and 
 goodness of fit S are based on F^2^, conventional R-factors R are based 
 on F, with F set to zero for negative F^2^. The threshold expression of 
 F^2^ > 2sigma(F^2^) is used only for calculating R-factors(gt) etc. and is 
 not relevant to the choice of reflections for refinement.  R-factors based 
 on F^2^ are statistically about twice as large as those based on F, and R- 
 factors based on ALL data will be even larger. 
; 
  
_refine_ls_structure_factor_coef  Fsqd 
_refine_ls_matrix_type            full 
_refine_ls_weighting_scheme       calc 
_refine_ls_weighting_details 
 'calc w=1/[\s^2^(Fo^2^)+(0.0836P)^2^+4.3131P] where P=(Fo^2^+2Fc^2^)/3' 
_atom_sites_solution_primary      direct 
_atom_sites_solution_secondary    difmap 
_atom_sites_solution_hydrogens    geom 
_refine_ls_hydrogen_treatment     mixed 
_refine_ls_extinction_method      none 
_refine_ls_extinction_coef        ? 
_refine_ls_number_reflns          6787 
_refine_ls_number_parameters      505 
_refine_ls_number_restraints      0 
_refine_ls_R_factor_all           0.0674 
_refine_ls_R_factor_gt            0.0435 
_refine_ls_wR_factor_ref          0.1263 
_refine_ls_wR_factor_gt           0.1096 
_refine_ls_goodness_of_fit_ref    0.842 
_refine_ls_restrained_S_all       0.842 
_refine_ls_shift/su_max           0.001 
_refine_ls_shift/su_mean          0.000 
  
loop_ 
 _atom_site_label 
 _atom_site_type_symbol 
 _atom_site_fract_x 
 _atom_site_fract_y 
 _atom_site_fract_z 
 _atom_site_U_iso_or_equiv 
 _atom_site_adp_type 
 _atom_site_occupancy 
 _atom_site_symmetry_multiplicity 
 _atom_site_calc_flag 
 _atom_site_refinement_flags 
 _atom_site_disorder_assembly 
 _atom_site_disorder_group 
Mn1 Mn 0.91789(4) 0.14315(2) 0.41700(3) 0.01623(13) Uani 1 1 d . . . 
C1 C 0.7662(3) 0.09977(16) 0.32938(18) 0.0206(6) Uani 1 1 d . . . 
H1A H 0.7658 0.0576 0.2981 0.025 Uiso 1 1 calc R . . 
C2 C 0.7250(3) 0.09664(15) 0.40304(19) 0.0197(6) Uani 1 1 d . . . 
H2A H 0.7005 0.0519 0.4227 0.024 Uiso 1 1 calc R . . 
C3 C 0.7190(3) 0.15981(15) 0.44954(18) 0.0167(6) Uani 1 1 d . . . 
C4 C 0.6689(3) 0.15903(15) 0.52367(18) 0.0192(6) Uani 1 1 d . . . 
H4A H 0.6396 0.1153 0.5432 0.023 Uiso 1 1 calc R . . 
C5 C 0.6632(3) 0.22039(16) 0.56581(18) 0.0208(6) Uani 1 1 d . . . 
H5A H 0.6279 0.2190 0.6140 0.025 Uiso 1 1 calc R . . 
C6 C 0.7094(3) 0.28766(16) 0.53946(18) 0.0200(6) Uani 1 1 d . . . 
C7 C 0.6997(3) 0.35182(17) 0.5816(2) 0.0266(7) Uani 1 1 d . . . 
H7A H 0.6659 0.3514 0.6303 0.032 Uiso 1 1 calc R . . 
C8 C 0.7394(3) 0.41537(17) 0.5518(2) 0.0297(8) Uani 1 1 d . . . 
H8A H 0.7327 0.4584 0.5807 0.036 Uiso 1 1 calc R . . 
C9 C 0.7887(3) 0.41819(16) 0.4811(2) 0.0270(8) Uani 1 1 d . . . 
H9A H 0.8161 0.4628 0.4625 0.032 Uiso 1 1 calc R . . 
C10 C 0.7987(3) 0.35581(15) 0.43678(19) 0.0193(6) Uani 1 1 d . . . 
C11 C 0.8418(3) 0.35648(16) 0.3603(2) 0.0242(7) Uani 1 1 d . . . 
H11A H 0.8674 0.4008 0.3400 0.029 Uiso 1 1 calc R . . 
C12 C 0.8470(3) 0.29708(16) 0.31692(19) 0.0223(7) Uani 1 1 d . . . 
H12A H 0.8774 0.2997 0.2671 0.027 Uiso 1 1 calc R . . 
C13 C 0.8066(3) 0.22866(15) 0.34527(18) 0.0176(6) Uani 1 1 d . . . 
C14 C 0.8088(3) 0.16527(16) 0.30047(19) 0.0206(6) Uani 1 1 d . . . 
H14A H 0.8391 0.1665 0.2506 0.025 Uiso 1 1 calc R . . 
C15 C 0.7589(3) 0.29000(15) 0.46706(18) 0.0168(6) Uani 1 1 d . . . 
C16 C 0.7618(3) 0.22603(14) 0.42080(17) 0.0154(6) Uani 1 1 d . . . 
C17 C 1.0393(3) 0.21035(15) 0.45027(18) 0.0194(6) Uani 1 1 d . . . 
O1 O 1.1108(2) 0.25402(11) 0.46952(13) 0.0245(5) Uani 1 1 d . . . 
C18 C 1.0313(3) 0.09409(15) 0.3667(2) 0.0237(7) Uani 1 1 d . . . 
O2 O 1.0996(2) 0.06407(12) 0.33298(16) 0.0337(6) Uani 1 1 d . . . 
C19 C 0.9632(3) 0.09225(15) 0.5088(2) 0.0222(7) Uani 1 1 d . . . 
O3 O 0.9892(2) 0.06067(12) 0.56499(14) 0.0298(5) Uani 1 1 d . . . 
B1 B 0.8763(3) 0.07462(18) 0.1140(2) 0.0212(7) Uani 1 1 d . . . 
F1 F 0.9238(2) 0.14083(10) 0.14275(13) 0.0380(5) Uani 1 1 d . . . 
F2 F 0.83060(19) 0.03544(10) 0.17327(12) 0.0318(5) Uani 1 1 d . . . 
F3 F 0.77715(19) 0.08717(10) 0.05205(12) 0.0339(5) Uani 1 1 d . . . 
F4 F 0.97180(19) 0.03599(9) 0.08462(12) 0.0296(4) Uani 1 1 d . . . 
Mn2 Mn 0.31199(4) 0.33776(2) 0.32549(3) 0.01506(13) Uani 1 1 d . . . 
C20 C 0.4592(3) 0.37448(16) 0.41998(18) 0.0189(6) Uani 1 1 d . . . 
H20A H 0.4582 0.4141 0.4550 0.023 Uiso 1 1 calc R . . 
C21 C 0.5039(3) 0.38373(15) 0.34782(18) 0.0175(6) Uani 1 1 d . . . 
H21A H 0.5298 0.4300 0.3331 0.021 Uiso 1 1 calc R . . 
C22 C 0.5115(3) 0.32422(15) 0.29531(18) 0.0172(6) Uani 1 1 d . . . 
C23 C 0.5614(3) 0.33177(16) 0.22164(19) 0.0206(6) Uani 1 1 d . . . 
H23A H 0.5876 0.3776 0.2057 0.025 Uiso 1 1 calc R . . 
C24 C 0.5714(3) 0.27396(16) 0.17476(19) 0.0211(6) Uani 1 1 d . . . 
H24A H 0.6060 0.2800 0.1267 0.025 Uiso 1 1 calc R . . 
C25 C 0.5312(3) 0.20416(16) 0.19553(18) 0.0193(6) Uani 1 1 d . . . 
C26 C 0.5487(3) 0.14321(17) 0.1499(2) 0.0247(7) Uani 1 1 d . . . 
H26A H 0.5834 0.1481 0.1017 0.030 Uiso 1 1 calc R . . 
C27 C 0.5155(3) 0.07587(17) 0.1748(2) 0.0286(8) Uani 1 1 d . . . 
H27A H 0.5297 0.0350 0.1439 0.034 Uiso 1 1 calc R . . 
C28 C 0.4621(3) 0.06718(16) 0.2437(2) 0.0246(7) Uani 1 1 d . . . 
H28A H 0.4383 0.0206 0.2589 0.029 Uiso 1 1 calc R . . 
C29 C 0.4429(3) 0.12643(15) 0.2913(2) 0.0211(7) Uani 1 1 d . . . 
C30 C 0.3946(3) 0.11913(16) 0.3655(2) 0.0234(7) Uani 1 1 d . . . 
H30A H 0.3708 0.0729 0.3816 0.028 Uiso 1 1 calc R . . 
C31 C 0.3819(3) 0.17581(16) 0.4133(2) 0.0209(7) Uani 1 1 d . . . 
H31A H 0.3472 0.1691 0.4612 0.025 Uiso 1 1 calc R . . 
C32 C 0.4209(3) 0.24682(15) 0.39182(18) 0.0183(6) Uani 1 1 d . . . 
C33 C 0.4153(3) 0.30678(15) 0.44180(18) 0.0184(6) Uani 1 1 d . . . 
H33A H 0.3819 0.3016 0.4904 0.022 Uiso 1 1 calc R . . 
C34 C 0.4782(3) 0.19502(15) 0.26683(18) 0.0181(6) Uani 1 1 d . . . 
C35 C 0.4690(3) 0.25594(15) 0.31758(17) 0.0158(6) Uani 1 1 d . . . 
C36 C 0.1931(3) 0.38655(15) 0.37140(18) 0.0194(6) Uani 1 1 d . . . 
O4 O 0.1184(2) 0.41767(11) 0.39862(14) 0.0261(5) Uani 1 1 d . . . 
C37 C 0.2762(3) 0.39406(16) 0.23742(19) 0.0206(6) Uani 1 1 d . . . 
O5 O 0.2573(2) 0.43107(12) 0.18373(14) 0.0280(5) Uani 1 1 d . . . 
C38 C 0.1907(3) 0.27238(14) 0.28706(18) 0.0171(6) Uani 1 1 d . . . 
O6 O 0.1178(2) 0.22946(11) 0.26584(13) 0.0235(5) Uani 1 1 d . . . 
B2 B 0.3796(4) 0.09974(18) 0.6312(2) 0.0250(8) Uani 1 1 d . . . 
F5 F 0.3154(3) 0.15858(13) 0.59697(16) 0.0653(8) Uani 1 1 d . . . 
F6 F 0.3025(2) 0.06294(10) 0.67635(13) 0.0361(5) Uani 1 1 d . . . 
F7 F 0.4179(2) 0.05563(10) 0.57376(13) 0.0412(6) Uani 1 1 d . . . 
F8 F 0.4873(2) 0.12336(14) 0.68130(16) 0.0580(7) Uani 1 1 d . . . 
  
loop_ 
 _atom_site_aniso_label 
 _atom_site_aniso_U_11 
 _atom_site_aniso_U_22 
 _atom_site_aniso_U_33 
 _atom_site_aniso_U_23 
 _atom_site_aniso_U_13 
 _atom_site_aniso_U_12 
Mn1 0.0153(2) 0.0142(2) 0.0196(3) -0.00002(17) 0.00366(18) 0.00083(16) 
C1 0.0163(15) 0.0213(14) 0.0227(17) -0.0069(12) -0.0027(12) 0.0019(12) 
C2 0.0161(15) 0.0177(14) 0.0249(17) -0.0022(12) 0.0017(12) -0.0031(11) 
C3 0.0117(14) 0.0173(13) 0.0206(16) -0.0006(11) 0.0008(12) -0.0009(11) 
C4 0.0151(15) 0.0223(14) 0.0202(16) 0.0034(12) 0.0028(12) -0.0021(11) 
C5 0.0173(16) 0.0296(16) 0.0162(16) -0.0005(12) 0.0047(12) 0.0010(12) 
C6 0.0145(15) 0.0245(15) 0.0202(16) -0.0037(12) -0.0007(12) 0.0033(12) 
C7 0.0194(17) 0.0285(16) 0.0305(19) -0.0102(14) -0.0011(14) 0.0053(13) 
C8 0.0210(18) 0.0223(16) 0.043(2) -0.0106(14) -0.0040(15) 0.0038(13) 
C9 0.0157(16) 0.0157(14) 0.046(2) -0.0031(14) -0.0079(15) 0.0008(12) 
C10 0.0105(14) 0.0154(13) 0.0305(18) 0.0025(12) -0.0020(12) -0.0009(11) 
C11 0.0157(16) 0.0201(15) 0.035(2) 0.0102(13) -0.0006(14) -0.0019(12) 
C12 0.0132(15) 0.0297(16) 0.0236(17) 0.0115(13) 0.0014(13) 0.0018(12) 
C13 0.0104(14) 0.0215(14) 0.0206(16) 0.0035(12) 0.0009(12) 0.0020(11) 
C14 0.0178(16) 0.0285(16) 0.0156(16) -0.0028(12) 0.0028(12) 0.0023(12) 
C15 0.0109(14) 0.0175(13) 0.0208(16) -0.0008(12) -0.0023(12) -0.0001(11) 
C16 0.0110(14) 0.0167(13) 0.0182(15) 0.0029(11) 0.0008(11) 0.0026(10) 
C17 0.0240(17) 0.0191(14) 0.0166(16) 0.0023(12) 0.0082(13) 0.0041(13) 
O1 0.0204(12) 0.0245(11) 0.0283(13) 0.0021(9) 0.0023(10) -0.0033(9) 
C18 0.0260(18) 0.0153(14) 0.0295(18) -0.0005(13) 0.0036(14) -0.0016(12) 
O2 0.0327(14) 0.0242(11) 0.0481(16) -0.0045(11) 0.0186(12) 0.0060(10) 
C19 0.0253(17) 0.0133(13) 0.0288(19) -0.0027(13) 0.0068(14) -0.0017(12) 
O3 0.0394(15) 0.0226(11) 0.0262(13) 0.0046(10) 0.0006(11) 0.0015(10) 
B1 0.026(2) 0.0166(15) 0.0229(19) -0.0025(13) 0.0088(15) -0.0018(13) 
F1 0.0443(13) 0.0308(10) 0.0433(13) -0.0160(9) 0.0202(11) -0.0132(9) 
F2 0.0401(12) 0.0307(10) 0.0286(11) 0.0046(8) 0.0186(9) 0.0013(9) 
F3 0.0328(12) 0.0358(11) 0.0327(12) 0.0046(9) 0.0030(9) 0.0034(9) 
F4 0.0343(11) 0.0232(9) 0.0354(11) 0.0029(8) 0.0184(9) 0.0044(8) 
Mn2 0.0126(2) 0.0144(2) 0.0181(3) -0.00077(17) 0.00176(18) -0.00088(16) 
C20 0.0110(14) 0.0237(15) 0.0210(17) -0.0053(12) -0.0009(12) 0.0015(11) 
C21 0.0118(14) 0.0156(13) 0.0239(16) -0.0024(11) -0.0014(12) -0.0025(11) 
C22 0.0126(15) 0.0186(14) 0.0201(16) -0.0018(12) 0.0018(12) -0.0007(11) 
C23 0.0151(15) 0.0226(15) 0.0238(17) 0.0026(12) 0.0017(13) -0.0016(11) 
C24 0.0162(15) 0.0298(16) 0.0176(16) 0.0007(12) 0.0040(12) -0.0025(12) 
C25 0.0116(15) 0.0252(15) 0.0200(16) -0.0049(12) -0.0014(12) 0.0025(11) 
C26 0.0177(16) 0.0316(17) 0.0239(18) -0.0082(13) 0.0006(13) 0.0053(13) 
C27 0.0220(18) 0.0253(16) 0.036(2) -0.0128(14) -0.0031(15) 0.0040(13) 
C28 0.0196(17) 0.0164(14) 0.035(2) -0.0008(13) -0.0045(14) 0.0019(12) 
C29 0.0132(15) 0.0182(14) 0.0299(18) -0.0017(12) -0.0033(13) -0.0006(11) 
C30 0.0163(16) 0.0177(14) 0.0351(19) 0.0079(13) -0.0001(14) -0.0019(12) 
C31 0.0121(15) 0.0243(15) 0.0268(18) 0.0059(13) 0.0041(13) -0.0003(11) 
C32 0.0135(15) 0.0210(14) 0.0200(16) 0.0031(12) 0.0010(12) 0.0016(11) 
C33 0.0144(15) 0.0257(15) 0.0150(15) 0.0001(12) 0.0021(12) 0.0033(12) 
C34 0.0103(14) 0.0178(14) 0.0252(17) -0.0025(12) -0.0007(12) -0.0001(11) 
C35 0.0115(14) 0.0181(13) 0.0176(15) 0.0009(11) 0.0013(11) 0.0018(11) 
C36 0.0164(15) 0.0173(14) 0.0234(17) -0.0001(12) -0.0010(13) -0.0025(12) 
O4 0.0178(12) 0.0240(11) 0.0363(14) -0.0059(10) 0.0032(10) 0.0018(9) 
C37 0.0157(16) 0.0211(15) 0.0247(18) -0.0028(13) 0.0019(13) -0.0037(12) 
O5 0.0288(13) 0.0243(11) 0.0290(13) 0.0068(10) -0.0021(10) -0.0045(9) 
C38 0.0193(16) 0.0156(13) 0.0170(15) 0.0032(11) 0.0043(12) 0.0009(12) 
O6 0.0213(12) 0.0221(11) 0.0263(13) -0.0011(9) 0.0015(10) -0.0038(9) 
B2 0.031(2) 0.0182(16) 0.029(2) -0.0015(14) 0.0171(17) -0.0012(14) 
F5 0.098(2) 0.0532(15) 0.0540(17) 0.0265(12) 0.0421(16) 0.0403(14) 
F6 0.0436(13) 0.0273(10) 0.0439(13) -0.0023(9) 0.0285(11) -0.0068(9) 
F7 0.0575(15) 0.0276(10) 0.0466(14) -0.0122(9) 0.0345(12) -0.0075(9) 
F8 0.0344(13) 0.0706(17) 0.0719(19) -0.0314(14) 0.0178(13) -0.0161(12) 
  
_geom_special_details 
; 
 All esds (except the esd in the dihedral angle between two l.s. planes) 
 are estimated using the full covariance matrix.  The cell esds are taken 
 into account individually in the estimation of esds in distances, angles 
 and torsion angles; correlations between esds in cell parameters are only 
 used when they are defined by crystal symmetry.  An approximate (isotropic) 
 treatment of cell esds is used for estimating esds involving l.s. planes. 
; 
  
loop_ 
 _geom_bond_atom_site_label_1 
 _geom_bond_atom_site_label_2 
 _geom_bond_distance 
 _geom_bond_site_symmetry_2 
 _geom_bond_publ_flag 
Mn1 C18 1.820(3) . ? 
Mn1 C17 1.824(3) . ? 
Mn1 C19 1.829(3) . ? 
Mn1 C1 2.179(3) . ? 
Mn1 C14 2.181(3) . ? 
Mn1 C2 2.198(3) . ? 
Mn1 C13 2.235(3) . ? 
Mn1 C16 2.270(3) . ? 
Mn1 C3 2.275(3) . ? 
C1 C2 1.387(4) . ? 
C1 C14 1.415(4) . ? 
C2 C3 1.425(4) . ? 
C3 C16 1.426(4) . ? 
C3 C4 1.438(4) . ? 
C4 C5 1.356(4) . ? 
C5 C6 1.441(4) . ? 
C6 C7 1.406(4) . ? 
C6 C15 1.408(4) . ? 
C7 C8 1.379(5) . ? 
C8 C9 1.380(5) . ? 
C9 C10 1.398(4) . ? 
C10 C15 1.419(4) . ? 
C10 C11 1.440(5) . ? 
C11 C12 1.337(5) . ? 
C12 C13 1.450(4) . ? 
C13 C14 1.408(4) . ? 
C13 C16 1.434(4) . ? 
C15 C16 1.432(4) . ? 
C17 O1 1.127(4) . ? 
C18 O2 1.135(4) . ? 
C19 O3 1.122(4) . ? 
B1 F2 1.388(4) . ? 
B1 F3 1.393(4) . ? 
B1 F4 1.392(4) . ? 
B1 F1 1.394(4) . ? 
Mn2 C36 1.819(3) . ? 
Mn2 C38 1.820(3) . ? 
Mn2 C37 1.823(3) . ? 
Mn2 C20 2.177(3) . ? 
Mn2 C21 2.186(3) . ? 
Mn2 C33 2.192(3) . ? 
Mn2 C32 2.257(3) . ? 
Mn2 C22 2.259(3) . ? 
Mn2 C35 2.274(3) . ? 
C20 C21 1.390(4) . ? 
C20 C33 1.414(4) . ? 
C21 C22 1.434(4) . ? 
C22 C35 1.420(4) . ? 
C22 C23 1.437(4) . ? 
C23 C24 1.354(4) . ? 
C24 C25 1.430(4) . ? 
C25 C26 1.404(4) . ? 
C25 C34 1.419(4) . ? 
C26 C27 1.387(5) . ? 
C27 C28 1.384(5) . ? 
C28 C29 1.402(4) . ? 
C29 C34 1.412(4) . ? 
C29 C30 1.437(5) . ? 
C30 C31 1.352(4) . ? 
C31 C32 1.449(4) . ? 
C32 C33 1.411(4) . ? 
C32 C35 1.439(4) . ? 
C34 C35 1.439(4) . ? 
C36 O4 1.133(4) . ? 
C37 O5 1.138(4) . ? 
C38 O6 1.133(3) . ? 
B2 F5 1.374(4) . ? 
B2 F6 1.383(4) . ? 
B2 F7 1.382(4) . ? 
B2 F8 1.390(5) . ? 
  
loop_ 
 _geom_angle_atom_site_label_1 
 _geom_angle_atom_site_label_2 
 _geom_angle_atom_site_label_3 
 _geom_angle 
 _geom_angle_site_symmetry_1 
 _geom_angle_site_symmetry_3 
 _geom_angle_publ_flag 
C18 Mn1 C17 90.45(13) . . ? 
C18 Mn1 C19 91.84(14) . . ? 
C17 Mn1 C19 90.45(13) . . ? 
C18 Mn1 C1 87.86(13) . . ? 
C17 Mn1 C1 151.83(13) . . ? 
C19 Mn1 C1 117.71(13) . . ? 
C18 Mn1 C14 88.03(13) . . ? 
C17 Mn1 C14 113.97(12) . . ? 
C19 Mn1 C14 155.58(13) . . ? 
C1 Mn1 C14 37.88(11) . . ? 
C18 Mn1 C2 114.67(12) . . ? 
C17 Mn1 C2 154.81(12) . . ? 
C19 Mn1 C2 90.56(13) . . ? 
C1 Mn1 C2 36.95(12) . . ? 
C14 Mn1 C2 67.53(12) . . ? 
C18 Mn1 C13 115.68(13) . . ? 
C17 Mn1 C13 88.25(12) . . ? 
C19 Mn1 C13 152.46(13) . . ? 
C1 Mn1 C13 67.39(11) . . ? 
C14 Mn1 C13 37.17(11) . . ? 
C2 Mn1 C13 79.41(11) . . ? 
C18 Mn1 C16 152.73(13) . . ? 
C17 Mn1 C16 90.32(12) . . ? 
C19 Mn1 C16 115.42(12) . . ? 
C1 Mn1 C16 78.84(11) . . ? 
C14 Mn1 C16 66.87(11) . . ? 
C2 Mn1 C16 66.65(10) . . ? 
C13 Mn1 C16 37.12(10) . . ? 
C18 Mn1 C3 151.76(12) . . ? 
C17 Mn1 C3 117.73(12) . . ? 
C19 Mn1 C3 89.93(13) . . ? 
C1 Mn1 C3 66.56(11) . . ? 
C14 Mn1 C3 79.08(11) . . ? 
C2 Mn1 C3 37.11(10) . . ? 
C13 Mn1 C3 66.63(10) . . ? 
C16 Mn1 C3 36.58(10) . . ? 
C2 C1 C14 120.6(3) . . ? 
C2 C1 Mn1 72.29(18) . . ? 
C14 C1 Mn1 71.14(17) . . ? 
C1 C2 C3 120.8(3) . . ? 
C1 C2 Mn1 70.77(17) . . ? 
C3 C2 Mn1 74.39(17) . . ? 
C16 C3 C2 118.9(3) . . ? 
C16 C3 C4 119.1(3) . . ? 
C2 C3 C4 122.0(3) . . ? 
C16 C3 Mn1 71.49(16) . . ? 
C2 C3 Mn1 68.50(16) . . ? 
C4 C3 Mn1 133.3(2) . . ? 
C5 C4 C3 120.4(3) . . ? 
C4 C5 C6 121.8(3) . . ? 
C7 C6 C15 118.9(3) . . ? 
C7 C6 C5 121.9(3) . . ? 
C15 C6 C5 119.1(3) . . ? 
C8 C7 C6 119.7(3) . . ? 
C9 C8 C7 121.9(3) . . ? 
C8 C9 C10 120.4(3) . . ? 
C9 C10 C15 118.3(3) . . ? 
C9 C10 C11 122.6(3) . . ? 
C15 C10 C11 119.1(3) . . ? 
C12 C11 C10 122.4(3) . . ? 
C11 C12 C13 120.5(3) . . ? 
C14 C13 C16 119.3(3) . . ? 
C14 C13 C12 122.0(3) . . ? 
C16 C13 C12 118.7(3) . . ? 
C14 C13 Mn1 69.33(17) . . ? 
C16 C13 Mn1 72.76(16) . . ? 
C12 C13 Mn1 130.7(2) . . ? 
C1 C14 C13 120.3(3) . . ? 
C1 C14 Mn1 70.98(17) . . ? 
C13 C14 Mn1 73.50(17) . . ? 
C6 C15 C10 120.9(3) . . ? 
C6 C15 C16 119.7(3) . . ? 
C10 C15 C16 119.3(3) . . ? 
C3 C16 C13 120.0(3) . . ? 
C3 C16 C15 119.9(3) . . ? 
C13 C16 C15 120.0(3) . . ? 
C3 C16 Mn1 71.93(16) . . ? 
C13 C16 Mn1 70.12(15) . . ? 
C15 C16 Mn1 131.1(2) . . ? 
O1 C17 Mn1 177.1(3) . . ? 
O2 C18 Mn1 177.6(3) . . ? 
O3 C19 Mn1 179.0(3) . . ? 
F2 B1 F3 109.5(3) . . ? 
F2 B1 F4 109.7(3) . . ? 
F3 B1 F4 108.7(3) . . ? 
F2 B1 F1 110.9(3) . . ? 
F3 B1 F1 108.0(3) . . ? 
F4 B1 F1 109.9(3) . . ? 
C36 Mn2 C38 89.63(13) . . ? 
C36 Mn2 C37 89.50(14) . . ? 
C38 Mn2 C37 92.32(13) . . ? 
C36 Mn2 C20 89.47(12) . . ? 
C38 Mn2 C20 149.95(12) . . ? 
C37 Mn2 C20 117.71(12) . . ? 
C36 Mn2 C21 114.39(12) . . ? 
C38 Mn2 C21 155.93(12) . . ? 
C37 Mn2 C21 89.56(12) . . ? 
C20 Mn2 C21 37.14(11) . . ? 
C36 Mn2 C33 91.66(12) . . ? 
C38 Mn2 C33 112.28(12) . . ? 
C37 Mn2 C33 155.38(12) . . ? 
C20 Mn2 C33 37.75(11) . . ? 
C21 Mn2 C33 67.63(11) . . ? 
C36 Mn2 C32 119.71(12) . . ? 
C38 Mn2 C32 87.56(12) . . ? 
C37 Mn2 C32 150.78(12) . . ? 
C20 Mn2 C32 67.06(11) . . ? 
C21 Mn2 C32 79.33(11) . . ? 
C33 Mn2 C32 36.95(11) . . ? 
C36 Mn2 C22 151.86(12) . . ? 
C38 Mn2 C22 118.48(12) . . ? 
C37 Mn2 C22 88.05(12) . . ? 
C20 Mn2 C22 67.15(11) . . ? 
C21 Mn2 C22 37.59(10) . . ? 
C33 Mn2 C22 79.46(11) . . ? 
C32 Mn2 C22 66.68(10) . . ? 
C36 Mn2 C35 156.68(12) . . ? 
C38 Mn2 C35 90.70(11) . . ? 
C37 Mn2 C35 113.78(12) . . ? 
C20 Mn2 C35 78.75(11) . . ? 
C21 Mn2 C35 66.73(10) . . ? 
C33 Mn2 C35 66.73(11) . . ? 
C32 Mn2 C35 37.04(10) . . ? 
C22 Mn2 C35 36.51(10) . . ? 
C21 C20 C33 120.7(3) . . ? 
C21 C20 Mn2 71.76(17) . . ? 
C33 C20 Mn2 71.68(17) . . ? 
C20 C21 C22 120.8(3) . . ? 
C20 C21 Mn2 71.10(17) . . ? 
C22 C21 Mn2 73.99(16) . . ? 
C35 C22 C23 119.5(3) . . ? 
C35 C22 C21 118.6(3) . . ? 
C23 C22 C21 121.9(3) . . ? 
C35 C22 Mn2 72.32(16) . . ? 
C23 C22 Mn2 131.5(2) . . ? 
C21 C22 Mn2 68.42(16) . . ? 
C24 C23 C22 120.4(3) . . ? 
C23 C24 C25 121.8(3) . . ? 
C26 C25 C34 118.5(3) . . ? 
C26 C25 C24 122.1(3) . . ? 
C34 C25 C24 119.3(3) . . ? 
C27 C26 C25 120.3(3) . . ? 
C26 C27 C28 121.2(3) . . ? 
C27 C28 C29 120.6(3) . . ? 
C28 C29 C34 118.4(3) . . ? 
C28 C29 C30 122.2(3) . . ? 
C34 C29 C30 119.3(3) . . ? 
C31 C30 C29 122.3(3) . . ? 
C30 C31 C32 120.4(3) . . ? 
C33 C32 C35 119.1(3) . . ? 
C33 C32 C31 122.2(3) . . ? 
C35 C32 C31 118.6(3) . . ? 
C33 C32 Mn2 69.04(16) . . ? 
C35 C32 Mn2 72.15(16) . . ? 
C31 C32 Mn2 132.0(2) . . ? 
C32 C33 C20 120.3(3) . . ? 
C32 C33 Mn2 74.02(17) . . ? 
C20 C33 Mn2 70.57(17) . . ? 
C29 C34 C25 121.0(3) . . ? 
C29 C34 C35 119.6(3) . . ? 
C25 C34 C35 119.2(3) . . ? 
C22 C35 C32 120.4(3) . . ? 
C22 C35 C34 119.7(3) . . ? 
C32 C35 C34 119.8(3) . . ? 
C22 C35 Mn2 71.17(16) . . ? 
C32 C35 Mn2 70.81(16) . . ? 
C34 C35 Mn2 132.8(2) . . ? 
O4 C36 Mn2 178.6(3) . . ? 
O5 C37 Mn2 177.3(3) . . ? 
O6 C38 Mn2 176.7(3) . . ? 
F5 B2 F6 109.6(3) . . ? 
F5 B2 F7 110.7(3) . . ? 
F6 B2 F7 110.8(3) . . ? 
F5 B2 F8 108.4(3) . . ? 
F6 B2 F8 108.3(3) . . ? 
F7 B2 F8 108.8(3) . . ? 
  
loop_ 
 _geom_torsion_atom_site_label_1 
 _geom_torsion_atom_site_label_2 
 _geom_torsion_atom_site_label_3 
 _geom_torsion_atom_site_label_4 
 _geom_torsion 
 _geom_torsion_site_symmetry_1 
 _geom_torsion_site_symmetry_2 
 _geom_torsion_site_symmetry_3 
 _geom_torsion_site_symmetry_4 
 _geom_torsion_publ_flag 
C18 Mn1 C1 C2 138.12(19) . . . . ? 
C17 Mn1 C1 C2 -134.9(3) . . . . ? 
C19 Mn1 C1 C2 47.2(2) . . . . ? 
C14 Mn1 C1 C2 -132.3(3) . . . . ? 
C13 Mn1 C1 C2 -102.85(19) . . . . ? 
C16 Mn1 C1 C2 -65.82(18) . . . . ? 
C3 Mn1 C1 C2 -29.58(17) . . . . ? 
C18 Mn1 C1 C14 -89.54(19) . . . . ? 
C17 Mn1 C1 C14 -2.6(3) . . . . ? 
C19 Mn1 C1 C14 179.51(18) . . . . ? 
C2 Mn1 C1 C14 132.3(3) . . . . ? 
C13 Mn1 C1 C14 29.48(17) . . . . ? 
C16 Mn1 C1 C14 66.52(18) . . . . ? 
C3 Mn1 C1 C14 102.76(19) . . . . ? 
C14 C1 C2 C3 3.0(5) . . . . ? 
Mn1 C1 C2 C3 57.3(3) . . . . ? 
C14 C1 C2 Mn1 -54.3(3) . . . . ? 
C18 Mn1 C2 C1 -47.2(2) . . . . ? 
C17 Mn1 C2 C1 128.2(3) . . . . ? 
C19 Mn1 C2 C1 -139.51(19) . . . . ? 
C14 Mn1 C2 C1 29.42(17) . . . . ? 
C13 Mn1 C2 C1 66.29(18) . . . . ? 
C16 Mn1 C2 C1 102.89(19) . . . . ? 
C3 Mn1 C2 C1 131.4(3) . . . . ? 
C18 Mn1 C2 C3 -178.59(18) . . . . ? 
C17 Mn1 C2 C3 -3.1(4) . . . . ? 
C19 Mn1 C2 C3 89.13(19) . . . . ? 
C1 Mn1 C2 C3 -131.4(3) . . . . ? 
C14 Mn1 C2 C3 -101.94(19) . . . . ? 
C13 Mn1 C2 C3 -65.06(18) . . . . ? 
C16 Mn1 C2 C3 -28.46(17) . . . . ? 
C1 C2 C3 C16 -2.9(4) . . . . ? 
Mn1 C2 C3 C16 52.7(2) . . . . ? 
C1 C2 C3 C4 175.9(3) . . . . ? 
Mn1 C2 C3 C4 -128.5(3) . . . . ? 
C1 C2 C3 Mn1 -55.6(3) . . . . ? 
C18 Mn1 C3 C16 -130.0(3) . . . . ? 
C17 Mn1 C3 C16 45.7(2) . . . . ? 
C19 Mn1 C3 C16 136.21(19) . . . . ? 
C1 Mn1 C3 C16 -103.30(19) . . . . ? 
C14 Mn1 C3 C16 -65.72(18) . . . . ? 
C2 Mn1 C3 C16 -132.8(3) . . . . ? 
C13 Mn1 C3 C16 -28.91(17) . . . . ? 
C18 Mn1 C3 C2 2.7(3) . . . . ? 
C17 Mn1 C3 C2 178.50(18) . . . . ? 
C19 Mn1 C3 C2 -91.03(19) . . . . ? 
C1 Mn1 C3 C2 29.46(18) . . . . ? 
C14 Mn1 C3 C2 67.04(18) . . . . ? 
C13 Mn1 C3 C2 103.84(19) . . . . ? 
C16 Mn1 C3 C2 132.8(3) . . . . ? 
C18 Mn1 C3 C4 117.1(3) . . . . ? 
C17 Mn1 C3 C4 -67.1(3) . . . . ? 
C19 Mn1 C3 C4 23.3(3) . . . . ? 
C1 Mn1 C3 C4 143.8(3) . . . . ? 
C14 Mn1 C3 C4 -178.6(3) . . . . ? 
C2 Mn1 C3 C4 114.4(3) . . . . ? 
C13 Mn1 C3 C4 -141.8(3) . . . . ? 
C16 Mn1 C3 C4 -112.9(3) . . . . ? 
C16 C3 C4 C5 -0.4(4) . . . . ? 
C2 C3 C4 C5 -179.2(3) . . . . ? 
Mn1 C3 C4 C5 91.0(4) . . . . ? 
C3 C4 C5 C6 -1.5(5) . . . . ? 
C4 C5 C6 C7 177.8(3) . . . . ? 
C4 C5 C6 C15 1.5(5) . . . . ? 
C15 C6 C7 C8 -0.5(5) . . . . ? 
C5 C6 C7 C8 -176.8(3) . . . . ? 
C6 C7 C8 C9 0.2(5) . . . . ? 
C7 C8 C9 C10 0.6(5) . . . . ? 
C8 C9 C10 C15 -1.0(5) . . . . ? 
C8 C9 C10 C11 176.0(3) . . . . ? 
C9 C10 C11 C12 -177.6(3) . . . . ? 
C15 C10 C11 C12 -0.7(5) . . . . ? 
C10 C11 C12 C13 1.1(5) . . . . ? 
C11 C12 C13 C14 178.9(3) . . . . ? 
C11 C12 C13 C16 -0.4(4) . . . . ? 
C11 C12 C13 Mn1 -91.8(4) . . . . ? 
C18 Mn1 C13 C14 45.8(2) . . . . ? 
C17 Mn1 C13 C14 135.46(19) . . . . ? 
C19 Mn1 C13 C14 -136.9(3) . . . . ? 
C1 Mn1 C13 C14 -30.01(18) . . . . ? 
C2 Mn1 C13 C14 -66.61(18) . . . . ? 
C16 Mn1 C13 C14 -131.7(3) . . . . ? 
C3 Mn1 C13 C14 -103.19(19) . . . . ? 
C18 Mn1 C13 C16 177.51(17) . . . . ? 
C17 Mn1 C13 C16 -92.83(18) . . . . ? 
C19 Mn1 C13 C16 -5.2(3) . . . . ? 
C1 Mn1 C13 C16 101.69(18) . . . . ? 
C14 Mn1 C13 C16 131.7(3) . . . . ? 
C2 Mn1 C13 C16 65.10(17) . . . . ? 
C3 Mn1 C13 C16 28.52(16) . . . . ? 
C18 Mn1 C13 C12 -69.1(3) . . . . ? 
C17 Mn1 C13 C12 20.5(3) . . . . ? 
C19 Mn1 C13 C12 108.1(4) . . . . ? 
C1 Mn1 C13 C12 -144.9(3) . . . . ? 
C14 Mn1 C13 C12 -114.9(4) . . . . ? 
C2 Mn1 C13 C12 178.5(3) . . . . ? 
C16 Mn1 C13 C12 113.4(4) . . . . ? 
C3 Mn1 C13 C12 141.9(3) . . . . ? 
C2 C1 C14 C13 -1.8(4) . . . . ? 
Mn1 C1 C14 C13 -56.7(3) . . . . ? 
C2 C1 C14 Mn1 54.9(3) . . . . ? 
C16 C13 C14 C1 0.6(4) . . . . ? 
C12 C13 C14 C1 -178.7(3) . . . . ? 
Mn1 C13 C14 C1 55.5(3) . . . . ? 
C16 C13 C14 Mn1 -54.9(2) . . . . ? 
C12 C13 C14 Mn1 125.8(3) . . . . ? 
C18 Mn1 C14 C1 89.05(19) . . . . ? 
C17 Mn1 C14 C1 178.66(18) . . . . ? 
C19 Mn1 C14 C1 -1.1(4) . . . . ? 
C2 Mn1 C14 C1 -28.74(17) . . . . ? 
C13 Mn1 C14 C1 -131.2(3) . . . . ? 
C16 Mn1 C14 C1 -101.90(19) . . . . ? 
C3 Mn1 C14 C1 -65.69(17) . . . . ? 
C18 Mn1 C14 C13 -139.72(19) . . . . ? 
C17 Mn1 C14 C13 -50.1(2) . . . . ? 
C19 Mn1 C14 C13 130.2(3) . . . . ? 
C1 Mn1 C14 C13 131.2(3) . . . . ? 
C2 Mn1 C14 C13 102.50(19) . . . . ? 
C16 Mn1 C14 C13 29.33(16) . . . . ? 
C3 Mn1 C14 C13 65.54(17) . . . . ? 
C7 C6 C15 C10 0.1(4) . . . . ? 
C5 C6 C15 C10 176.5(3) . . . . ? 
C7 C6 C15 C16 -176.0(3) . . . . ? 
C5 C6 C15 C16 0.4(4) . . . . ? 
C9 C10 C15 C6 0.7(4) . . . . ? 
C11 C10 C15 C6 -176.4(3) . . . . ? 
C9 C10 C15 C16 176.7(3) . . . . ? 
C11 C10 C15 C16 -0.3(4) . . . . ? 
C2 C3 C16 C13 1.7(4) . . . . ? 
C4 C3 C16 C13 -177.1(3) . . . . ? 
Mn1 C3 C16 C13 53.0(2) . . . . ? 
C2 C3 C16 C15 -178.9(3) . . . . ? 
C4 C3 C16 C15 2.3(4) . . . . ? 
Mn1 C3 C16 C15 -127.6(3) . . . . ? 
C2 C3 C16 Mn1 -51.3(2) . . . . ? 
C4 C3 C16 Mn1 129.9(3) . . . . ? 
C14 C13 C16 C3 -0.6(4) . . . . ? 
C12 C13 C16 C3 178.7(3) . . . . ? 
Mn1 C13 C16 C3 -53.8(2) . . . . ? 
C14 C13 C16 C15 -180.0(3) . . . . ? 
C12 C13 C16 C15 -0.7(4) . . . . ? 
Mn1 C13 C16 C15 126.8(3) . . . . ? 
C14 C13 C16 Mn1 53.3(2) . . . . ? 
C12 C13 C16 Mn1 -127.4(3) . . . . ? 
C6 C15 C16 C3 -2.3(4) . . . . ? 
C10 C15 C16 C3 -178.4(3) . . . . ? 
C6 C15 C16 C13 177.1(3) . . . . ? 
C10 C15 C16 C13 1.0(4) . . . . ? 
C6 C15 C16 Mn1 -93.9(3) . . . . ? 
C10 C15 C16 Mn1 90.0(3) . . . . ? 
C18 Mn1 C16 C3 127.8(3) . . . . ? 
C17 Mn1 C16 C3 -140.65(19) . . . . ? 
C19 Mn1 C16 C3 -50.0(2) . . . . ? 
C1 Mn1 C16 C3 65.52(18) . . . . ? 
C14 Mn1 C16 C3 103.28(19) . . . . ? 
C2 Mn1 C16 C3 28.85(17) . . . . ? 
C13 Mn1 C16 C3 132.7(3) . . . . ? 
C18 Mn1 C16 C13 -4.9(3) . . . . ? 
C17 Mn1 C16 C13 86.69(18) . . . . ? 
C19 Mn1 C16 C13 177.34(17) . . . . ? 
C1 Mn1 C16 C13 -67.14(17) . . . . ? 
C14 Mn1 C16 C13 -29.37(17) . . . . ? 
C2 Mn1 C16 C13 -103.81(19) . . . . ? 
C3 Mn1 C16 C13 -132.7(3) . . . . ? 
C18 Mn1 C16 C15 -117.9(3) . . . . ? 
C17 Mn1 C16 C15 -26.3(3) . . . . ? 
C19 Mn1 C16 C15 64.3(3) . . . . ? 
C1 Mn1 C16 C15 179.9(3) . . . . ? 
C14 Mn1 C16 C15 -142.4(3) . . . . ? 
C2 Mn1 C16 C15 143.2(3) . . . . ? 
C13 Mn1 C16 C15 -113.0(3) . . . . ? 
C3 Mn1 C16 C15 114.3(3) . . . . ? 
C18 Mn1 C17 O1 127(5) . . . . ? 
C19 Mn1 C17 O1 -141(5) . . . . ? 
C1 Mn1 C17 O1 41(6) . . . . ? 
C14 Mn1 C17 O1 39(6) . . . . ? 
C2 Mn1 C17 O1 -48(6) . . . . ? 
C13 Mn1 C17 O1 12(5) . . . . ? 
C16 Mn1 C17 O1 -25(5) . . . . ? 
C3 Mn1 C17 O1 -51(6) . . . . ? 
C17 Mn1 C18 O2 -113(7) . . . . ? 
C19 Mn1 C18 O2 156(7) . . . . ? 
C1 Mn1 C18 O2 39(7) . . . . ? 
C14 Mn1 C18 O2 1(7) . . . . ? 
C2 Mn1 C18 O2 65(7) . . . . ? 
C13 Mn1 C18 O2 -25(7) . . . . ? 
C16 Mn1 C18 O2 -22(7) . . . . ? 
C3 Mn1 C18 O2 63(7) . . . . ? 
C18 Mn1 C19 O3 -119(17) . . . . ? 
C17 Mn1 C19 O3 151(17) . . . . ? 
C1 Mn1 C19 O3 -30(17) . . . . ? 
C14 Mn1 C19 O3 -29(17) . . . . ? 
C2 Mn1 C19 O3 -4(17) . . . . ? 
C13 Mn1 C19 O3 64(17) . . . . ? 
C16 Mn1 C19 O3 60(17) . . . . ? 
C3 Mn1 C19 O3 33(17) . . . . ? 
C36 Mn2 C20 C21 -134.11(18) . . . . ? 
C38 Mn2 C20 C21 137.5(2) . . . . ? 
C37 Mn2 C20 C21 -45.0(2) . . . . ? 
C33 Mn2 C20 C21 132.5(3) . . . . ? 
C32 Mn2 C20 C21 103.06(19) . . . . ? 
C22 Mn2 C20 C21 29.80(16) . . . . ? 
C35 Mn2 C20 C21 66.14(17) . . . . ? 
C36 Mn2 C20 C33 93.39(19) . . . . ? 
C38 Mn2 C20 C33 5.0(3) . . . . ? 
C37 Mn2 C20 C33 -177.45(18) . . . . ? 
C21 Mn2 C20 C33 -132.5(3) . . . . ? 
C32 Mn2 C20 C33 -29.44(16) . . . . ? 
C22 Mn2 C20 C33 -102.70(18) . . . . ? 
C35 Mn2 C20 C33 -66.36(17) . . . . ? 
C33 C20 C21 C22 -2.6(4) . . . . ? 
Mn2 C20 C21 C22 -57.1(3) . . . . ? 
C33 C20 C21 Mn2 54.5(2) . . . . ? 
C36 Mn2 C21 C20 52.0(2) . . . . ? 
C38 Mn2 C21 C20 -124.0(3) . . . . ? 
C37 Mn2 C21 C20 141.28(19) . . . . ? 
C33 Mn2 C21 C20 -29.22(17) . . . . ? 
C32 Mn2 C21 C20 -65.90(18) . . . . ? 
C22 Mn2 C21 C20 -131.4(3) . . . . ? 
C35 Mn2 C21 C20 -102.48(19) . . . . ? 
C36 Mn2 C21 C22 -176.62(18) . . . . ? 
C38 Mn2 C21 C22 7.3(4) . . . . ? 
C37 Mn2 C21 C22 -87.37(19) . . . . ? 
C20 Mn2 C21 C22 131.4(3) . . . . ? 
C33 Mn2 C21 C22 102.14(19) . . . . ? 
C32 Mn2 C21 C22 65.45(18) . . . . ? 
C35 Mn2 C21 C22 28.87(16) . . . . ? 
C20 C21 C22 C35 1.7(4) . . . . ? 
Mn2 C21 C22 C35 -54.0(2) . . . . ? 
C20 C21 C22 C23 -177.8(3) . . . . ? 
Mn2 C21 C22 C23 126.4(3) . . . . ? 
C20 C21 C22 Mn2 55.7(2) . . . . ? 
C36 Mn2 C22 C35 138.3(3) . . . . ? 
C38 Mn2 C22 C35 -44.8(2) . . . . ? 
C37 Mn2 C22 C35 -136.39(19) . . . . ? 
C20 Mn2 C22 C35 102.33(19) . . . . ? 
C21 Mn2 C22 C35 131.8(3) . . . . ? 
C33 Mn2 C22 C35 64.92(18) . . . . ? 
C32 Mn2 C22 C35 28.53(17) . . . . ? 
C36 Mn2 C22 C23 -107.6(3) . . . . ? 
C38 Mn2 C22 C23 69.2(3) . . . . ? 
C37 Mn2 C22 C23 -22.3(3) . . . . ? 
C20 Mn2 C22 C23 -143.6(3) . . . . ? 
C21 Mn2 C22 C23 -114.2(3) . . . . ? 
C33 Mn2 C22 C23 179.0(3) . . . . ? 
C32 Mn2 C22 C23 142.6(3) . . . . ? 
C35 Mn2 C22 C23 114.0(3) . . . . ? 
C36 Mn2 C22 C21 6.5(3) . . . . ? 
C38 Mn2 C22 C21 -176.61(18) . . . . ? 
C37 Mn2 C22 C21 91.82(19) . . . . ? 
C20 Mn2 C22 C21 -29.46(17) . . . . ? 
C33 Mn2 C22 C21 -66.87(18) . . . . ? 
C32 Mn2 C22 C21 -103.26(19) . . . . ? 
C35 Mn2 C22 C21 -131.8(3) . . . . ? 
C35 C22 C23 C24 -1.9(4) . . . . ? 
C21 C22 C23 C24 177.7(3) . . . . ? 
Mn2 C22 C23 C24 -93.8(3) . . . . ? 
C22 C23 C24 C25 1.1(5) . . . . ? 
C23 C24 C25 C26 -175.8(3) . . . . ? 
C23 C24 C25 C34 0.6(4) . . . . ? 
C34 C25 C26 C27 -0.4(4) . . . . ? 
C24 C25 C26 C27 176.0(3) . . . . ? 
C25 C26 C27 C28 1.4(5) . . . . ? 
C26 C27 C28 C29 -1.5(5) . . . . ? 
C27 C28 C29 C34 0.6(5) . . . . ? 
C27 C28 C29 C30 -176.4(3) . . . . ? 
C28 C29 C30 C31 176.7(3) . . . . ? 
C34 C29 C30 C31 -0.2(5) . . . . ? 
C29 C30 C31 C32 -1.9(5) . . . . ? 
C30 C31 C32 C33 -176.7(3) . . . . ? 
C30 C31 C32 C35 2.1(4) . . . . ? 
C30 C31 C32 Mn2 93.4(4) . . . . ? 
C36 Mn2 C32 C33 -45.3(2) . . . . ? 
C38 Mn2 C32 C33 -133.47(19) . . . . ? 
C37 Mn2 C32 C33 136.2(3) . . . . ? 
C20 Mn2 C32 C33 30.04(17) . . . . ? 
C21 Mn2 C32 C33 66.81(18) . . . . ? 
C22 Mn2 C32 C33 103.98(19) . . . . ? 
C35 Mn2 C32 C33 132.1(3) . . . . ? 
C36 Mn2 C32 C35 -177.42(17) . . . . ? 
C38 Mn2 C32 C35 94.41(18) . . . . ? 
C37 Mn2 C32 C35 4.0(3) . . . . ? 
C20 Mn2 C32 C35 -102.08(18) . . . . ? 
C21 Mn2 C32 C35 -65.32(17) . . . . ? 
C33 Mn2 C32 C35 -132.1(3) . . . . ? 
C22 Mn2 C32 C35 -28.14(16) . . . . ? 
C36 Mn2 C32 C31 69.8(3) . . . . ? 
C38 Mn2 C32 C31 -18.4(3) . . . . ? 
C37 Mn2 C32 C31 -108.8(3) . . . . ? 
C20 Mn2 C32 C31 145.1(3) . . . . ? 
C21 Mn2 C32 C31 -178.1(3) . . . . ? 
C33 Mn2 C32 C31 115.1(4) . . . . ? 
C22 Mn2 C32 C31 -140.9(3) . . . . ? 
C35 Mn2 C32 C31 -112.8(4) . . . . ? 
C35 C32 C33 C20 -1.5(4) . . . . ? 
C31 C32 C33 C20 177.4(3) . . . . ? 
Mn2 C32 C33 C20 -55.4(2) . . . . ? 
C35 C32 C33 Mn2 53.9(2) . . . . ? 
C31 C32 C33 Mn2 -127.3(3) . . . . ? 
C21 C20 C33 C32 2.5(4) . . . . ? 
Mn2 C20 C33 C32 57.0(2) . . . . ? 
C21 C20 C33 Mn2 -54.5(3) . . . . ? 
C36 Mn2 C33 C32 141.86(18) . . . . ? 
C38 Mn2 C33 C32 51.6(2) . . . . ? 
C37 Mn2 C33 C32 -125.7(3) . . . . ? 
C20 Mn2 C33 C32 -131.1(3) . . . . ? 
C21 Mn2 C33 C32 -102.36(19) . . . . ? 
C22 Mn2 C33 C32 -65.02(17) . . . . ? 
C35 Mn2 C33 C32 -29.10(16) . . . . ? 
C36 Mn2 C33 C20 -87.00(18) . . . . ? 
C38 Mn2 C33 C20 -177.27(17) . . . . ? 
C37 Mn2 C33 C20 5.4(4) . . . . ? 
C21 Mn2 C33 C20 28.78(16) . . . . ? 
C32 Mn2 C33 C20 131.1(3) . . . . ? 
C22 Mn2 C33 C20 66.12(17) . . . . ? 
C35 Mn2 C33 C20 102.04(18) . . . . ? 
C28 C29 C34 C25 0.4(4) . . . . ? 
C30 C29 C34 C25 177.4(3) . . . . ? 
C28 C29 C34 C35 -175.1(3) . . . . ? 
C30 C29 C34 C35 1.9(4) . . . . ? 
C26 C25 C34 C29 -0.5(4) . . . . ? 
C24 C25 C34 C29 -177.0(3) . . . . ? 
C26 C25 C34 C35 175.1(3) . . . . ? 
C24 C25 C34 C35 -1.5(4) . . . . ? 
C23 C22 C35 C32 178.8(3) . . . . ? 
C21 C22 C35 C32 -0.7(4) . . . . ? 
Mn2 C22 C35 C32 -52.9(2) . . . . ? 
C23 C22 C35 C34 1.0(4) . . . . ? 
C21 C22 C35 C34 -178.6(3) . . . . ? 
Mn2 C22 C35 C34 129.2(3) . . . . ? 
C23 C22 C35 Mn2 -128.3(3) . . . . ? 
C21 C22 C35 Mn2 52.2(2) . . . . ? 
C33 C32 C35 C22 0.6(4) . . . . ? 
C31 C32 C35 C22 -178.3(3) . . . . ? 
Mn2 C32 C35 C22 53.1(2) . . . . ? 
C33 C32 C35 C34 178.5(3) . . . . ? 
C31 C32 C35 C34 -0.4(4) . . . . ? 
Mn2 C32 C35 C34 -129.1(3) . . . . ? 
C33 C32 C35 Mn2 -52.4(2) . . . . ? 
C31 C32 C35 Mn2 128.7(3) . . . . ? 
C29 C34 C35 C22 176.3(3) . . . . ? 
C25 C34 C35 C22 0.7(4) . . . . ? 
C29 C34 C35 C32 -1.6(4) . . . . ? 
C25 C34 C35 C32 -177.2(3) . . . . ? 
C29 C34 C35 Mn2 -92.4(3) . . . . ? 
C25 C34 C35 Mn2 92.0(3) . . . . ? 
C36 Mn2 C35 C22 -127.6(3) . . . . ? 
C38 Mn2 C35 C22 141.71(19) . . . . ? 
C37 Mn2 C35 C22 48.9(2) . . . . ? 
C20 Mn2 C35 C22 -66.62(18) . . . . ? 
C21 Mn2 C35 C22 -29.68(17) . . . . ? 
C33 Mn2 C35 C22 -104.25(19) . . . . ? 
C32 Mn2 C35 C22 -133.3(3) . . . . ? 
C36 Mn2 C35 C32 5.7(4) . . . . ? 
C38 Mn2 C35 C32 -85.01(18) . . . . ? 
C37 Mn2 C35 C32 -177.85(17) . . . . ? 
C20 Mn2 C35 C32 66.65(17) . . . . ? 
C21 Mn2 C35 C32 103.60(19) . . . . ? 
C33 Mn2 C35 C32 29.03(17) . . . . ? 
C22 Mn2 C35 C32 133.3(3) . . . . ? 
C36 Mn2 C35 C34 118.9(4) . . . . ? 
C38 Mn2 C35 C34 28.3(3) . . . . ? 
C37 Mn2 C35 C34 -64.6(3) . . . . ? 
C20 Mn2 C35 C34 179.9(3) . . . . ? 
C21 Mn2 C35 C34 -143.1(3) . . . . ? 
C33 Mn2 C35 C34 142.3(3) . . . . ? 
C32 Mn2 C35 C34 113.3(3) . . . . ? 
C22 Mn2 C35 C34 -113.5(3) . . . . ? 
C38 Mn2 C36 O4 -86(12) . . . . ? 
C37 Mn2 C36 O4 6(12) . . . . ? 
C20 Mn2 C36 O4 124(12) . . . . ? 
C21 Mn2 C36 O4 95(12) . . . . ? 
C33 Mn2 C36 O4 161(12) . . . . ? 
C32 Mn2 C36 O4 -173(100) . . . . ? 
C22 Mn2 C36 O4 91(12) . . . . ? 
C35 Mn2 C36 O4 -177(100) . . . . ? 
C36 Mn2 C37 O5 89(6) . . . . ? 
C38 Mn2 C37 O5 179(100) . . . . ? 
C20 Mn2 C37 O5 0(6) . . . . ? 
C21 Mn2 C37 O5 -25(6) . . . . ? 
C33 Mn2 C37 O5 -4(6) . . . . ? 
C32 Mn2 C37 O5 -92(6) . . . . ? 
C22 Mn2 C37 O5 -63(6) . . . . ? 
C35 Mn2 C37 O5 -89(6) . . . . ? 
C36 Mn2 C38 O6 -105(5) . . . . ? 
C37 Mn2 C38 O6 166(5) . . . . ? 
C20 Mn2 C38 O6 -17(5) . . . . ? 
C21 Mn2 C38 O6 72(5) . . . . ? 
C33 Mn2 C38 O6 -13(5) . . . . ? 
C32 Mn2 C38 O6 15(5) . . . . ? 
C22 Mn2 C38 O6 77(5) . . . . ? 
C35 Mn2 C38 O6 52(5) . . . . ? 
  
_diffrn_measured_fraction_theta_max    0.999 
_diffrn_reflns_theta_full              26.38 
_diffrn_measured_fraction_theta_full   0.999 
_refine_diff_density_max    0.660 
_refine_diff_density_min   -0.335 
_refine_diff_density_rms    0.082 
